# Supplementary material for: A platform trial of neoadjuvant and adjuvant antitumor vaccination alone or in combination with PD-1 antagonist and CD137 agonist antibodies in patients with resectable pancreatic adenocarcinoma
Source: PubMed Central journal article supplement (PMC10281953; doi:10.1038/s41467-023-39196-9), 2023-06-20
Supplement: 41467_2023_39196_MOESM3_ESM.pdf [file 41467_2023_39196_MOESM3_ESM.pdf]

## **Description of Additional Supplementary Files**

**Supplementary Data 1:** Disaggregated data at Individual Patient Level
